# Supplementary material for: Synthesizing qualitative and quantitative evidence on non-financial access barriers: implications for assessment at the district level
Source: Springer Nature journal article supplement (doi:10.1186/s12939-015-0181-z), 2015-06-08
Supplement: MOESM1 [file 9762576]

## Appendix

### Search strings qualitative review

#### **Bangladesh**

((Bangladesh\*) AND Health\* AND (maternal OR \*natal OR newborn OR infan\* OR child\*)) OR ((Bangladesh\*) AND Health\* AND (maternal OR \*natal OR newborn OR infan\* OR child\*) AND (access\* OR uptake OR utili\*)) OR ((Bangladesh\*) AND Health\* AND (maternal OR \*natal OR newborn OR infan\* OR child\*) AND (barrier\* OR imped\* OR obstacle\* OR bottleneck\* OR constrain\*)) OR ((Bangladesh\*) AND Health\* AND (maternal OR \*natal OR newborn OR infan\* OR child\*) AND (\*seek\* OR demand\*))

#### **Ghana**

((Ghana\*) AND Health\* AND (maternal OR \*natal OR newborn OR infan\* OR child\*)) OR ((Ghana\*) AND Health\* AND (maternal OR \*natal OR newborn OR infan\* OR child\*) AND (access\* OR uptake OR utili\*)) OR ((Ghana\*) AND Health\* AND (maternal OR \*natal OR newborn OR infan\* OR child\*) AND (barrier\* OR imped\* OR obstacle\* OR bottleneck\* OR constrain\*)) OR ((Ghana\*) AND Health\* AND (maternal OR \*natal OR newborn OR infan\* OR child\*) AND (\*seek\* OR demand\*))

#### **Rwanda**

((Rwanda\*) AND Health\* AND (maternal OR \*natal OR newborn OR infan\* OR child\*)) OR ((Rwanda\*) AND Health\* AND (maternal OR natal OR newborn OR infan\* OR child\*) AND (access\* OR uptake OR utili\*)) OR ((Rwanda\*) AND Health\* AND (maternal OR \*natal OR newborn OR infan\* OR child\*) AND (barrier\* OR imped\* OR obstacle\* OR bottleneck\* OR constrain\*)) OR ((Rwanda\*) AND Health\* AND (maternal OR \*natal OR newborn OR infan\* OR child\*) AND (\*seek\* OR demand\*))

#### **Vietnam**

("Viet nam" OR vietnam\*) AND Health\* AND (maternal OR \*natal OR newborn OR infan\* OR child\*) ) OR ("Viet nam" OR vietnam\*) AND Health\* AND (maternal OR \*natal OR newborn OR infan\* OR child\*) AND (access\* OR uptake OR utili\*) OR ("Viet nam" OR vietnam\*) AND Health\* AND (maternal OR \*natal OR newborn OR infan\* OR child\*) AND (barrier\* OR imped\* OR obstacle\* OR bottleneck\* OR constrain\*) OR ("Viet nam" OR vietnam\*) AND Health\* AND (maternal OR \*natal OR newborn OR infan\* OR child\*) AND (\*seek\* OR demand\*)

### Search strings quantitative review

#### **Bangladesh**

((health services accessibility[MeSH Terms]) OR (utilization OR bottleneck\* OR access\*)) AND (survey\* OR cross sectional surveys[MeSH Terms] OR health care surveys[MeSH Terms]) AND Bangladesh AND ("2000/01/01"[PDAT] : "2012/12/31"[PDAT]).

#### **Ghana**

((health services accessibility[MeSH Terms]) OR (utilization OR bottleneck\* OR access\*)) AND (survey\* OR cross sectional surveys[MeSH Terms] OR health care surveys[MeSH Terms]) AND Ghana AND ("2000/01/01"[PDAT] : "2012/12/31"[PDAT])

#### **Rwanda**

((health services accessibility[MeSH Terms]) OR (utilization OR bottleneck\* OR access\*)) AND (survey\* OR cross sectional surveys[MeSH Terms] OR health care surveys[MeSH Terms]) AND Rwanda AND ("2000/01/01"[PDAT] : "2012/12/31"[PDAT])

#### **Vietnam**

((health services accessibility[MeSH Terms]) OR (utilization OR bottleneck\* OR access\*)) AND (survey\* OR cross sectional surveys[MeSH Terms] OR health care surveys[MeSH Terms]) AND Vietnam AND ("2000/01/01"[PDAT] : "2012/12/31"[PDAT])

### **Link to structured reviews**

Access to health services: analysing non-financial barriers in Ghana, Bangladesh, Vietnam and Rwanda using qualitative methods. A review of the literature. UNICEF Working Paper. Bedford, J., A. Singh, M. Ponferrada and L. Eldred (2013).

[https://www.dropbox.com/sh/1kkw1wdp10235jw/AADFJ2gYisqxa7PozHMDhwCca/2%20Anthrologica\\_qualitative%20methods%20non-financial%20UHC%20access%20barriers.pdf?dl=0](https://www.dropbox.com/sh/1kkw1wdp10235jw/AADFJ2gYisqxa7PozHMDhwCca/2%20Anthrologica_qualitative%20methods%20non-financial%20UHC%20access%20barriers.pdf?dl=0)

Access to health services: analysing non-financial barriers in Ghana, Rwanda, Bangladesh and Vietnam using household survey data. A review of the literature. UNICEF Working Paper. Thiede, M. and K. Koltermann (2013).

[https://www.dropbox.com/sh/1kkw1wdp10235jw/AADQCJrgytjuc2FYiB5RiBs3a/3%20Scenarium\\_quantitative%20methods%20non-financial%20UHC%20access%20barriers.pdf?dl=0](https://www.dropbox.com/sh/1kkw1wdp10235jw/AADQCJrgytjuc2FYiB5RiBs3a/3%20Scenarium_quantitative%20methods%20non-financial%20UHC%20access%20barriers.pdf?dl=0)
